# Supplementary material
Source: publisher site journal article supplement (https://www.dovepress.com/get_supplementary_file.php?f=247101.docx)
Supplement: Supplementary file 1 [file get_supplementary_file.php]

**Supplementary table S1 Multicolinearity test for admission to ICU，being in coma condition and central venous catheter**

| Model | Dimension | Eigenvalue | Condition index | Variance proportion | | | |
| --- | --- | --- | --- | --- | --- | --- | --- |
| Constant | Admission to ICU | Being in coma condition | Central venous catheter |
| 1 | 1 | 2.483 | 1.000 | 0.05 | 0.05 | 0.04 | 0.05 |
|  | 2 | 0.843 | 1.720 | 0.01 | 0.00 | 0.72 | 0.16 |
|  | 3 | 0.450 | 2.349 | 0.01 | 0.48 | 0.21 | 0.49 |
|  | 4 | 0.227 | 3.310 | 0.94 | 0.47 | 0.03 | 0.29 |
